# Supplementary material for: Genetic Diversity of Black Amaranth (Amaranthus quitensis Kunth) Landraces of Ecuadorian Highlands: Association Genotypes—Color Morphotypes
Source: MDPI journal article supplement (doi:10.3390/agriculture13010034), 2022-12-22
Supplement: s1 [file s1]

**Supplementary Table S1.** Allelic combinations or genotypes (G1 to G17) found in the 139 ataco (*A. quitensis*) accessions analyzed with nine microsatellite loci. The accessions are identified with the INIAP Germplasm Bank (BG) code and the analysis code used for this study (A1 to A139). The collection and province of origin are indicated, as well as the number of the analyzed sample. At the end of the table, the genotypes found in the commercial variety INIAP-Alegría are included.

| INIAP GB<br>Code * | Analysis<br>Code | Province<br>Collection   | No.                        | 1_GB<br>AMM-051 |     | 2_GB<br>AMM-099 |     | 3_GB<br>AMM-136 |     | 4_AH<br>AAC011 |     | 5_AH<br>AAC021 |     | 6_AH<br>AAT030 |     | 7_AH<br>AAT051 |     | 8_AH<br>AAT063 |     | 9_AH<br>AC062 |     | G   |    |
|--------------------|------------------|--------------------------|----------------------------|-----------------|-----|-----------------|-----|-----------------|-----|----------------|-----|----------------|-----|----------------|-----|----------------|-----|----------------|-----|---------------|-----|-----|----|
| ECU-03             | A1               | Imbabura<br>Collection A | 1                          | 234             | 234 | 151             | 151 | 196             | 196 | 175            | 175 | 141            | 141 | 194            | 194 | 177            | 177 | 171            | 171 | 235           | 235 | G1  |    |
|                    |                  |                          | 2                          | 240             | 240 | 157             | 157 | 205             | 205 | 178            | 178 | 162            | 162 | 226            | 226 | 165            | 165 | 201            | 201 | 166           | 166 | G2  |    |
| ECU-06             | A2               |                          | 3                          | 240             | 240 | 157             | 157 | 205             | 205 | 178            | 178 | 162            | 162 | 226            | 226 | 165            | 165 | 201            | 201 | 166           | 166 | G2  |    |
|                    |                  |                          | 4                          | 240             | 240 | 151             | 157 | 205             | 205 | 178            | 178 | 162            | 162 | 226            | 226 | 165            | 165 | 201            | 201 | 166           | 166 | G8  |    |
| ECU-10             | A03              |                          | 5                          | 234             | 234 | 151             | 151 | 196             | 196 | 175            | 175 | 141            | 141 | 194            | 194 | 177            | 177 | 171            | 171 | 235           | 235 | G1  |    |
| ECU-41             | A04              |                          | 6                          | 234             | 234 | 151             | 151 | 196             | 196 | 175            | 175 | 141            | 141 | 194            | 194 | 177            | 177 | 171            | 171 | 235           | 235 | G1  |    |
| ECU-42             | A05              |                          | 7                          | 234             | 234 | 151             | 151 | 196             | 196 | 175            | 175 | 141            | 141 | 194            | 194 | 177            | 177 | 171            | 171 | 235           | 235 | G1  |    |
| ECU-43             | A6               |                          | 8                          | 234             | 234 | 151             | 151 | 196             | 205 | 175            | 175 | 141            | 141 | 194            | 194 | 177            | 177 | 171            | 171 | 235           | 235 | G9  |    |
|                    |                  |                          | 9                          | 234             | 234 | 151             | 151 | 196             | 196 | 175            | 175 | 141            | 171 | 194            | 194 | 177            | 177 | 171            | 171 | 235           | 235 | G10 |    |
| ECU-48             | A7               |                          | 10                         | 240             | 240 | 157             | 157 | 205             | 205 | 178            | 178 | 162            | 162 | 226            | 226 | 165            | 165 | 201            | 201 | 166           | 166 | G2  |    |
| ECU-49             | A8               |                          | 11                         | 234             | 234 | 151             | 157 | 196             | 196 | 175            | 175 | 141            | 141 | 194            | 194 | 177            | 177 | 171            | 171 | 235           | 235 | G5  |    |
|                    |                  |                          | 12                         | 234             | 234 | 151             | 151 | 196             | 196 | 175            | 175 | 141            | 141 | 194            | 194 | 177            | 177 | 171            | 171 | 235           | 235 | G1  |    |
| ECU-50             | A09              |                          | 13                         | 234             | 234 | 151             | 151 | 196             | 196 | 175            | 175 | 141            | 141 | 194            | 194 | 177            | 177 | 171            | 171 | 235           | 235 | G1  |    |
| ECU-08             | A10              |                          | Tungurahua<br>Collection A | 14              | 234 | 234             | 151 | 151             | 196 | 196            | 175 | 175            | 141 | 141            | 194 | 194            | 177 | 177            | 171 | 171           | 235 | 235 | G1 |
| ECU-09             | A11              |                          |                            | 15              | 234 | 234             | 151 | 151             | 196 | 196            | 175 | 175            | 141 | 141            | 194 | 194            | 177 | 177            | 171 | 171           | 235 | 235 | G1 |
| ECU-22             | A12              |                          |                            | 16              | 234 | 234             | 151 | 151             | 196 | 196            | 175 | 175            | 141 | 141            | 194 | 194            | 177 | 177            | 171 | 171           | 235 | 235 | G1 |
| ECU-23             | A13              |                          |                            | 17              | 234 | 234             | 151 | 151             | 196 | 196            | 175 | 175            | 141 | 141            | 194 | 194            | 177 | 177            | 171 | 171           | 235 | 235 | G1 |
| ECU-24             | A14              |                          |                            | 18              | 234 | 234             | 151 | 151             | 196 | 196            | 175 | 175            | 141 | 141            | 194 | 194            | 177 | 177            | 171 | 171           | 235 | 235 | G1 |
| ECU-52             | A15              |                          |                            | 19              | 234 | 234             | 151 | 151             | 196 | 196            | 175 | 175            | 141 | 141            | 194 | 194            | 177 | 177            | 171 | 171           | 235 | 235 | G1 |
| ECU-53             | A16              |                          |                            | 20              | 234 | 234             | 151 | 151             | 196 | 196            | 175 | 175            | 141 | 141            | 194 | 194            | 177 | 177            | 171 | 171           | 235 | 235 | G1 |
|                    |                  | 21                       |                            | 231             | 234 | 151             | 151 | 196             | 196 | 175            | 175 | 141            | 141 | 194            | 194 | 177            | 177 | 171            | 171 | 235           | 235 | G11 |    |
| ECU-54             | A17              | 22                       |                            | 234             | 234 | 151             | 151 | 196             | 196 | 175            | 175 | 141            | 141 | 194            | 194 | 177            | 177 | 171            | 171 | 237           | 237 | G3  |    |
| ECU-55             | A18              | 23                       |                            | 234             | 234 | 151             | 151 | 196             | 196 | 175            | 175 | 141            | 141 | 194            | 194 | 177            | 177 | 171            | 171 | 235           | 235 | G1  |    |
| ECU-56             | A19              | 24                       |                            | 234             | 234 | 151             | 151 | 196             | 196 | 175            | 175 | 141            | 141 | 194            | 194 | 177            | 177 | 171            | 171 | 235           | 235 | G1  |    |
| ECU-57             | A20              | 25                       |                            | 234             | 234 | 151             | 157 | 196             | 196 | 175            | 175 | 141            | 141 | 194            | 194 | 177            | 177 | 171            | 171 | 235           | 235 | G5  |    |
|                    |                  | 26                       |                            | 234             | 234 | 151             | 151 | 196             | 196 | 175            | 175 | 141            | 141 | 194            | 194 | 177            | 177 | 171            | 171 | 235           | 235 | G1  |    |

Supplementary Table S1. Continued.

| INIAP GB<br>Code* | Analysis<br>Code | Province<br>Collection     | 1_GB<br>AMM-051 |     | 2_GB<br>AMM-099 |     | 3_GB<br>AMM-136 |     | 4_AH<br>AAC011 |     | 5_AH<br>AAC021 |     | 6_AH<br>AAT030 |     | 7_AH<br>AAT051 |     | 8_AH<br>AAT063 |     | 9_AH<br>AC062 |     | G   |    |
|-------------------|------------------|----------------------------|-----------------|-----|-----------------|-----|-----------------|-----|----------------|-----|----------------|-----|----------------|-----|----------------|-----|----------------|-----|---------------|-----|-----|----|
| ECU-58            | A21              | Tungurahua<br>Collection A | 27              | 234 | 234             | 151 | 151             | 196 | 196            | 175 | 175            | 141 | 141            | 194 | 194            | 177 | 177            | 171 | 171           | 235 | 235 | G1 |
| ECU-59            | A22              |                            | 28              | 234 | 234             | 151 | 151             | 196 | 196            | 175 | 175            | 141 | 141            | 194 | 194            | 177 | 177            | 171 | 171           | 235 | 235 | G1 |
| ECU-60            | A23              |                            | 29              | 234 | 234             | 151 | 151             | 196 | 196            | 175 | 175            | 141 | 141            | 194 | 194            | 177 | 177            | 171 | 171           | 235 | 235 | G1 |
| ECU-63            | A24              |                            | 30              | 234 | 234             | 151 | 151             | 196 | 196            | 175 | 175            | 141 | 141            | 194 | 194            | 177 | 177            | 171 | 171           | 235 | 235 | G1 |
| ECU-64            | A25              |                            | 31              | 234 | 234             | 151 | 151             | 196 | 196            | 175 | 175            | 141 | 141            | 194 | 194            | 177 | 177            | 171 | 171           | 235 | 235 | G1 |
| ECU-65            | A26              |                            | 32              | 234 | 234             | 151 | 151             | 196 | 196            | 175 | 175            | 141 | 141            | 194 | 194            | 177 | 177            | 171 | 171           | 235 | 235 | G1 |
| ECU-66            | A27              |                            | 33              | 234 | 234             | 151 | 151             | 196 | 196            | 175 | 175            | 141 | 141            | 194 | 194            | 177 | 177            | 171 | 171           | 235 | 235 | G1 |
| ECU-67            | A28              |                            | 34              | 234 | 234             | 151 | 151             | 196 | 196            | 175 | 175            | 141 | 141            | 194 | 194            | 177 | 177            | 171 | 171           | 235 | 235 | G1 |
| ECU-68            | A29              |                            | 35              | 234 | 234             | 151 | 151             | 196 | 196            | 175 | 175            | 141 | 141            | 194 | 194            | 177 | 177            | 171 | 171           | 235 | 235 | G1 |
| ECU-69            | A30              |                            | 36              | 234 | 234             | 151 | 151             | 196 | 196            | 175 | 175            | 141 | 141            | 194 | 194            | 177 | 177            | 171 | 171           | 235 | 235 | G1 |
| ECU-71            | A31              |                            | 37              | 234 | 234             | 151 | 151             | 196 | 196            | 175 | 175            | 141 | 141            | 194 | 194            | 177 | 177            | 171 | 171           | 235 | 235 | G1 |
| ECU-72            | A32              |                            | 38              | 234 | 234             | 151 | 151             | 196 | 196            | 175 | 175            | 141 | 141            | 194 | 194            | 177 | 177            | 171 | 171           | 235 | 235 | G1 |
| ECU-73            | A33              | 39                         | 234             | 234 | 151             | 151 | 196             | 196 | 175            | 175 | 141            | 141 | 194            | 194 | 177            | 177 | 171            | 171 | 235           | 235 | G1  |    |
| ECU-01            | A34              | 40                         | 234             | 234 | 151             | 151 | 196             | 196 | 175            | 175 | 141            | 141 | 194            | 194 | 177            | 177 | 171            | 171 | 235           | 235 | G1  |    |
| ECU-02            | A35              | 41                         | 234             | 234 | 151             | 151 | 196             | 196 | 175            | 175 | 141            | 141 | 194            | 194 | 177            | 177 | 171            | 171 | 235           | 235 | G1  |    |
| ECU-05            | A36              | 42                         | 234             | 234 | 151             | 151 | 196             | 196 | 175            | 175 | 141            | 141 | 194            | 194 | 177            | 177 | 171            | 171 | 235           | 235 | G1  |    |
| ECU-07            | A37              | 43                         | 234             | 234 | 151             | 151 | 196             | 196 | 175            | 175 | 141            | 141 | 194            | 194 | 177            | 177 | 171            | 171 | 235           | 235 | G1  |    |
| ECU-87            | A38              | 44                         | 234             | 234 | 151             | 151 | 196             | 196 | 175            | 175 | 141            | 141 | 194            | 194 | 177            | 177 | 171            | 171 | 235           | 235 | G1  |    |
| ECU-88            | A39              | 45                         | 234             | 234 | 151             | 151 | 196             | 196 | 175            | 175 | 141            | 141 | 194            | 194 | 177            | 177 | 171            | 171 | 235           | 235 | G1  |    |
| ECU-89            | A40              | 46                         | 234             | 234 | 151             | 151 | 196             | 196 | 175            | 175 | 141            | 141 | 194            | 194 | 177            | 177 | 171            | 171 | 235           | 235 | G1  |    |
| ECU-90            | A41              | 47                         | 234             | 234 | 151             | 151 | 196             | 196 | 175            | 175 | 141            | 141 | 194            | 194 | 177            | 177 | 171            | 171 | 235           | 235 | G1  |    |
| ECU-93            | A42              | 48                         | 234             | 234 | 151             | 151 | 196             | 196 | 175            | 175 | 141            | 141 | 194            | 194 | 177            | 180 | 171            | 171 | 235           | 237 | G12 |    |
|                   |                  | 49                         | 234             | 234 | 151             | 151 | 196             | 196 | 175            | 175 | 141            | 141 | 194            | 194 | 177            | 177 | 171            | 171 | 235           | 235 | G1  |    |
| ECU-94            | A43              | 50                         | 234             | 234 | 151             | 151 | 196             | 196 | 175            | 175 | 141            | 141 | 194            | 194 | 177            | 177 | 171            | 171 | 235           | 235 | G1  |    |
| ECU-95            | A44              | 51                         | 234             | 234 | 151             | 151 | 196             | 196 | 175            | 178 | 141            | 141 | 194            | 194 | 177            | 177 | 159            | 159 | 235           | 235 | G13 |    |
|                   |                  | 52                         | 234             | 234 | 151             | 151 | 196             | 196 | 175            | 175 | 141            | 141 | 194            | 194 | 177            | 177 | 159            | 159 | 235           | 235 | G14 |    |
| ECU-96            | A45              | 53                         | 234             | 234 | 151             | 151 | 196             | 196 | 175            | 175 | 141            | 141 | 194            | 194 | 177            | 177 | 171            | 171 | 235           | 235 | G1  |    |
| ECU-97            | A46              | 54                         | 234             | 234 | 151             | 151 | 196             | 196 | 175            | 175 | 141            | 141 | 194            | 194 | 177            | 177 | 171            | 171 | 235           | 235 | G1  |    |

Supplementary Table S1. Continued.

| INIAP GB<br>Code * | Analysis<br>Code | Province<br>Collection   | Nº | 1_GB<br>AMM-051 | 2_GB<br>AMM-099 | 3_GB<br>AMM-136 | 4_AH<br>AAC011 | 5_AH<br>AAC021 | 6_AH<br>AAT030 | 7_AH<br>AAT051 | 8_AH<br>AAT063 | 9_AH<br>AC062 | G   |     |     |     |     |     |     |     |     |     |
|--------------------|------------------|--------------------------|----|-----------------|-----------------|-----------------|----------------|----------------|----------------|----------------|----------------|---------------|-----|-----|-----|-----|-----|-----|-----|-----|-----|-----|
| ECU-99             | A47              | Cañar<br>Collection A    | 55 | 234             | 234             | 151             | 151            | 196            | 196            | 175            | 175            | 141           | 141 | 194 | 194 | 177 | 177 | 171 | 171 | 235 | 235 | G1  |
| ECU-100            | A48              |                          | 56 | 234             | 234             | 151             | 151            | 196            | 196            | 175            | 175            | 141           | 141 | 194 | 194 | 177 | 180 | 171 | 171 | 235 | 235 | G4  |
| ECU-101            | A49              |                          | 57 | 234             | 234             | 151             | 151            | 196            | 196            | 175            | 175            | 141           | 141 | 194 | 194 | 177 | 177 | 171 | 171 | 235 | 235 | G1  |
| ECU-102            | A50              |                          | 58 | 234             | 234             | 151             | 151            | 196            | 196            | 175            | 175            | 141           | 141 | 194 | 194 | 177 | 177 | 171 | 171 | 235 | 235 | G1  |
| HDJV-156           | A51              | Imbabura<br>Collection B | 59 | 234             | 234             | 151             | 151            | 196            | 196            | 175            | 175            | 141           | 141 | 194 | 194 | 177 | 177 | 171 | 171 | 235 | 235 | G1  |
|                    |                  |                          | 60 | 234             | 234             | 151             | 151            | 196            | 196            | 175            | 175            | 141           | 141 | 194 | 194 | 177 | 180 | 171 | 171 | 235 | 235 | G4  |
| ECU-27408          | A52              |                          | 61 | 234             | 234             | 151             | 151            | 196            | 196            | 175            | 175            | 141           | 141 | 194 | 194 | 177 | 177 | 171 | 171 | 235 | 235 | G1  |
| ECU-27409          | A53              |                          | 62 | 234             | 234             | 151             | 151            | 196            | 196            | 175            | 175            | 141           | 141 | 194 | 194 | 177 | 177 | 171 | 171 | 235 | 235 | G1  |
| ECU-27411          | A54              |                          | 63 | 234             | 234             | 151             | 151            | 196            | 196            | 175            | 175            | 141           | 141 | 194 | 194 | 177 | 177 | 171 | 171 | 235 | 235 | G1  |
| ECU-27412          | A55              |                          | 64 | 234             | 234             | 151             | 151            | 196            | 196            | 175            | 175            | 141           | 141 | 194 | 194 | 177 | 177 | 171 | 171 | 235 | 235 | G1  |
| HDEB-162           | A56              |                          | 65 | 240             | 240             | 157             | 157            | 205            | 205            | 178            | 178            | 162           | 162 | 226 | 226 | 165 | 165 | 201 | 201 | 166 | 166 | G2  |
| ECU-27413          | A57              |                          | 66 | 234             | 234             | 151             | 151            | 196            | 196            | 175            | 175            | 141           | 141 | 194 | 194 | 177 | 177 | 171 | 171 | 235 | 235 | G1  |
| ECU-27414          | A58              |                          | 67 | 240             | 240             | 157             | 157            | 205            | 205            | 178            | 178            | 162           | 162 | 226 | 226 | 165 | 165 | 201 | 201 | 166 | 166 | G2  |
| ECU-27415          | A59              |                          | 68 | 234             | 234             | 151             | 151            | 196            | 196            | 175            | 175            | 141           | 141 | 194 | 194 | 177 | 177 | 171 | 171 | 235 | 235 | G1  |
| ECU-27416          | A60              |                          | 69 | 234             | 234             | 151             | 151            | 196            | 196            | 175            | 175            | 141           | 141 | 194 | 194 | 177 | 177 | 171 | 171 | 235 | 235 | G1  |
| ECU-27417          | A61              |                          | 70 | 240             | 240             | 157             | 157            | 205            | 205            | 178            | 178            | 162           | 162 | 226 | 226 | 165 | 165 | 201 | 201 | 166 | 166 | G2  |
|                    |                  |                          | 71 | 234             | 234             | 151             | 151            | 196            | 196            | 175            | 175            | 141           | 141 | 194 | 194 | 177 | 177 | 171 | 171 | 235 | 235 | G1  |
| ECU-27419          | A62              |                          | 72 | 234             | 234             | 151             | 151            | 196            | 196            | 175            | 175            | 141           | 141 | 194 | 194 | 177 | 177 | 171 | 171 | 235 | 235 | G1  |
| ECU-27418          | A63              |                          | 73 | 234             | 234             | 151             | 151            | 196            | 196            | 175            | 175            | 141           | 141 | 194 | 194 | 177 | 177 | 171 | 171 | 235 | 235 | G1  |
| ECU-27420          | A64              |                          | 74 | 234             | 234             | 151             | 151            | 196            | 196            | 175            | 175            | 141           | 141 | 194 | 194 | 177 | 177 | 171 | 171 | 235 | 235 | G1  |
| ECU-27421          | A65              |                          | 75 | 234             | 234             | 151             | 151            | 196            | 196            | 175            | 175            | 141           | 141 | 194 | 194 | 177 | 177 | 171 | 171 | 235 | 235 | G1  |
| ECU-27422          | A66              |                          | 76 | 234             | 234             | 151             | 151            | 196            | 196            | 175            | 175            | 141           | 141 | 194 | 194 | 177 | 177 | 171 | 171 | 235 | 235 | G1  |
| ECU-27410          | A67              |                          | 77 | 234             | 234             | 151             | 151            | 196            | 196            | 175            | 175            | 141           | 141 | 194 | 194 | 177 | 177 | 171 | 171 | 235 | 235 | G1  |
| ECU-27423          | A68              |                          | 78 | 240             | 240             | 157             | 157            | 205            | 205            | 178            | 178            | 162           | 162 | 226 | 226 | 168 | 168 | 201 | 201 | 164 | 164 | G6  |
| ECU-27424          | A69              |                          | 79 | 237             | 240             | 151             | 157            | 202            | 208            | 175            | 175            | 162           | 171 | 188 | 238 | 192 | 195 | 183 | 189 | 235 | 235 | G15 |
|                    |                  |                          | 80 | 234             | 234             | 151             | 151            | 196            | 196            | 175            | 175            | 141           | 141 | 194 | 194 | 177 | 177 | 171 | 171 | 235 | 235 | G1  |
| ECU-27425          | A70              |                          | 81 | 234             | 234             | 151             | 151            | 196            | 196            | 175            | 175            | 141           | 141 | 194 | 194 | 177 | 177 | 171 | 171 | 235 | 235 | G1  |

Supplementary Table S1. Continued.

| INIAP GB<br>Code* | Analysis<br>Code | Province<br>Collection   | Nº  | 1_GB<br>AMM-051 | 2_GB<br>AMM-099 | 3_GB<br>AMM-136 | 4_AH<br>AAC011 | 5_AH<br>AAC021 | 6_AH<br>AAT030 | 7_AH<br>AAT051 | 8_AH<br>AAT063 | 9_AH<br>AC062 | G   |     |     |     |     |     |     |     |     |     |
|-------------------|------------------|--------------------------|-----|-----------------|-----------------|-----------------|----------------|----------------|----------------|----------------|----------------|---------------|-----|-----|-----|-----|-----|-----|-----|-----|-----|-----|
| ECU-27426         | A71              | Imbabura<br>Collection B | 82  | 234             | 234             | 151             | 151            | 196            | 196            | 175            | 175            | 141           | 141 | 194 | 194 | 177 | 177 | 171 | 171 | 235 | 235 | G1  |
|                   |                  |                          | 83  | 234             | 234             | 151             | 151            | 196            | 196            | 175            | 175            | 141           | 141 | 194 | 226 | 177 | 177 | 171 | 171 | 235 | 235 | G16 |
| ECU-27427         | A72              |                          | 84  | 234             | 234             | 151             | 151            | 196            | 196            | 175            | 175            | 141           | 141 | 194 | 194 | 177 | 177 | 171 | 171 | 235 | 235 | G1  |
|                   |                  |                          | 85  | 234             | 234             | 151             | 151            | 196            | 196            | 175            | 175            | 141           | 141 | 226 | 226 | 177 | 177 | 171 | 171 | 235 | 235 | G17 |
| ECU-27428         | A73              |                          | 86  | 234             | 234             | 151             | 151            | 196            | 196            | 175            | 175            | 141           | 141 | 194 | 194 | 177 | 177 | 171 | 171 | 235 | 235 | G1  |
| HDEB-227          | A74              |                          | 87  | 234             | 234             | 151             | 151            | 196            | 196            | 175            | 175            | 141           | 141 | 194 | 194 | 177 | 177 | 171 | 171 | 235 | 235 | G1  |
| ECU-27489         | A75              |                          | 88  | 234             | 234             | 151             | 151            | 196            | 196            | 175            | 175            | 141           | 141 | 194 | 194 | 177 | 177 | 171 | 171 | 235 | 235 | G1  |
| ECU-27490         | A76              |                          | 89  | 234             | 234             | 151             | 151            | 196            | 196            | 175            | 175            | 141           | 141 | 194 | 194 | 177 | 177 | 171 | 171 | 235 | 235 | G1  |
| ECU-27495         | A77              |                          | 90  | 234             | 234             | 151             | 151            | 196            | 196            | 175            | 175            | 141           | 141 | 194 | 194 | 177 | 177 | 171 | 171 | 235 | 235 | G1  |
| ECU-27491         | A78              |                          | 91  | 234             | 234             | 151             | 151            | 196            | 196            | 175            | 175            | 141           | 141 | 194 | 194 | 177 | 177 | 171 | 171 | 235 | 235 | G1  |
| ECU-27496         | A79              | 92                       | 240 | 240             | 157             | 157             | 208            | 208            | 175            | 175            | 162            | 162           | 226 | 226 | 165 | 165 | 207 | 207 | 208 | 208 | G7  |     |
| HDJV-229          | A80              | 93                       | 234 | 234             | 151             | 151             | 196            | 196            | 175            | 175            | 141            | 141           | 194 | 194 | 177 | 177 | 171 | 171 | 235 | 235 | G1  |     |
| ECU-27432         | A81              | 94                       | 234 | 234             | 151             | 151             | 196            | 196            | 175            | 175            | 141            | 141           | 194 | 194 | 177 | 177 | 171 | 171 | 235 | 235 | G1  |     |
| ECU-27433         | A82              | 95                       | 234 | 234             | 151             | 151             | 196            | 196            | 175            | 175            | 141            | 141           | 194 | 194 | 177 | 177 | 171 | 171 | 235 | 235 | G1  |     |
| ECU-27434         | A83              | 96                       | 234 | 234             | 151             | 151             | 196            | 196            | 175            | 175            | 141            | 141           | 194 | 194 | 177 | 177 | 171 | 171 | 235 | 235 | G1  |     |
| ECU-27435         | A84              | 97                       | 234 | 234             | 151             | 151             | 196            | 196            | 175            | 175            | 141            | 141           | 194 | 194 | 177 | 177 | 171 | 171 | 235 | 235 | G1  |     |
| ECU-27436         | A85              | 98                       | 234 | 234             | 151             | 151             | 196            | 196            | 175            | 175            | 141            | 141           | 194 | 194 | 177 | 177 | 171 | 171 | 235 | 235 | G1  |     |
| ECU-27437         | A86              | 99                       | 234 | 234             | 151             | 151             | 196            | 196            | 175            | 175            | 141            | 141           | 194 | 194 | 177 | 177 | 171 | 171 | 235 | 235 | G1  |     |
| ECU-27438         | A87              | 100                      | 234 | 234             | 151             | 151             | 196            | 196            | 175            | 175            | 141            | 141           | 194 | 194 | 177 | 177 | 171 | 171 | 235 | 235 | G1  |     |
| ECU-27439         | A88              | 101                      | 234 | 234             | 151             | 151             | 196            | 196            | 175            | 175            | 141            | 141           | 194 | 194 | 177 | 177 | 171 | 171 | 235 | 235 | G1  |     |
| ECU-27440         | A89              | 102                      | 234 | 234             | 151             | 151             | 196            | 196            | 175            | 175            | 141            | 141           | 194 | 194 | 177 | 177 | 171 | 171 | 235 | 235 | G1  |     |
| ECU-27441         | A90              | 103                      | 234 | 234             | 151             | 151             | 196            | 196            | 175            | 175            | 141            | 141           | 194 | 194 | 177 | 177 | 171 | 171 | 235 | 235 | G1  |     |
| ECU-27442         | A91              | 104                      | 234 | 234             | 151             | 151             | 196            | 196            | 175            | 175            | 141            | 141           | 194 | 194 | 177 | 177 | 171 | 171 | 235 | 235 | G1  |     |
| ECU-27443         | A92              | 105                      | 234 | 234             | 151             | 151             | 196            | 196            | 175            | 175            | 141            | 141           | 194 | 194 | 177 | 177 | 171 | 171 | 235 | 235 | G1  |     |
| ECU-27444         | A93              | 106                      | 234 | 234             | 151             | 151             | 196            | 196            | 175            | 175            | 141            | 141           | 194 | 194 | 177 | 177 | 171 | 171 | 235 | 235 | G1  |     |
| ECU-27445         | A94              | 107                      | 234 | 234             | 151             | 151             | 196            | 196            | 175            | 175            | 141            | 141           | 194 | 194 | 177 | 177 | 171 | 171 | 235 | 235 | G1  |     |
| ECU-27446         | A95              | 108                      | 234 | 234             | 151             | 151             | 196            | 196            | 175            | 175            | 141            | 141           | 194 | 194 | 177 | 177 | 171 | 171 | 235 | 235 | G1  |     |
| ECU-27447         | A96              | 109                      | 234 | 234             | 151             | 151             | 196            | 196            | 175            | 175            | 141            | 141           | 194 | 194 | 177 | 177 | 171 | 171 | 235 | 235 | G1  |     |

Supplementary Table S1. Continued.

| INIAP GB<br>Code* | Analysis<br>Code | Province<br>Collection     | Nº  | 1_GB<br>AMM-051 | 2_GB<br>AMM-099 | 3_GB<br>AMM-136 | 4_AH<br>AAC011 | 5_AH<br>AAC021 | 6_AH<br>AAT030 | 7_AH<br>AAT051 | 8_AH<br>AAT063 | 9_AH<br>AC062 | G   |     |     |     |     |     |     |     |     |    |
|-------------------|------------------|----------------------------|-----|-----------------|-----------------|-----------------|----------------|----------------|----------------|----------------|----------------|---------------|-----|-----|-----|-----|-----|-----|-----|-----|-----|----|
| ECU-27448         | A97              | Tungurahua<br>Collection B | 110 | 234             | 234             | 151             | 151            | 196            | 196            | 175            | 175            | 141           | 141 | 194 | 194 | 177 | 177 | 171 | 171 | 235 | 235 | G1 |
| ECU-27449         | A98              |                            | 111 | 234             | 234             | 151             | 151            | 196            | 196            | 175            | 175            | 141           | 141 | 194 | 194 | 177 | 177 | 171 | 171 | 235 | 235 | G1 |
| ECU-27450         | A99              |                            | 112 | 234             | 234             | 151             | 151            | 196            | 196            | 175            | 175            | 141           | 141 | 194 | 194 | 177 | 177 | 171 | 171 | 235 | 235 | G1 |
| ECU-27451         | A100             |                            | 113 | 234             | 234             | 151             | 151            | 196            | 196            | 175            | 175            | 141           | 141 | 194 | 194 | 177 | 177 | 171 | 171 | 235 | 235 | G1 |
| ECU-27452         | A101             |                            | 114 | 234             | 234             | 151             | 151            | 196            | 196            | 175            | 175            | 141           | 141 | 194 | 194 | 177 | 177 | 171 | 171 | 235 | 235 | G1 |
| ECU-27453         | A102             |                            | 115 | 234             | 234             | 151             | 151            | 196            | 196            | 175            | 175            | 141           | 141 | 194 | 194 | 177 | 177 | 171 | 171 | 235 | 235 | G1 |
| ECU-27454         | A103             |                            | 116 | 234             | 234             | 151             | 151            | 196            | 196            | 175            | 175            | 141           | 141 | 194 | 194 | 177 | 177 | 171 | 171 | 237 | 237 | G3 |
| ECU-27457         | A104             |                            | 117 | 234             | 234             | 151             | 151            | 196            | 196            | 175            | 175            | 141           | 141 | 194 | 194 | 177 | 177 | 171 | 171 | 235 | 235 | G1 |
| ECU-27459         | A105             |                            | 118 | 234             | 234             | 151             | 151            | 196            | 196            | 175            | 175            | 141           | 141 | 194 | 194 | 177 | 177 | 171 | 171 | 235 | 235 | G1 |
| ECU-27460         | A106             |                            | 119 | 234             | 234             | 151             | 151            | 196            | 196            | 175            | 175            | 141           | 141 | 194 | 194 | 177 | 177 | 171 | 171 | 235 | 235 | G1 |
| ECU-27461         | A107             |                            | 120 | 234             | 234             | 151             | 151            | 196            | 196            | 175            | 175            | 141           | 141 | 194 | 194 | 177 | 177 | 171 | 171 | 235 | 235 | G1 |
| ECU-27462         | A108             |                            | 121 | 234             | 234             | 151             | 151            | 196            | 196            | 175            | 175            | 141           | 141 | 194 | 194 | 177 | 177 | 171 | 171 | 235 | 235 | G1 |
| ECU-27463         | A109             | 122                        | 234 | 234             | 151             | 151             | 196            | 196            | 175            | 175            | 141            | 141           | 194 | 194 | 177 | 177 | 171 | 171 | 235 | 235 | G1  |    |
| ECU-27494         | A110             | 123                        | 234 | 234             | 151             | 151             | 196            | 196            | 175            | 175            | 141            | 141           | 194 | 194 | 177 | 177 | 171 | 171 | 235 | 235 | G1  |    |
| ECU-27464         | A111             | 124                        | 234 | 234             | 151             | 151             | 196            | 196            | 175            | 175            | 141            | 141           | 194 | 194 | 177 | 177 | 171 | 171 | 235 | 235 | G1  |    |
| ECU-27465         | A112             | 125                        | 234 | 234             | 151             | 151             | 196            | 196            | 175            | 175            | 141            | 141           | 194 | 194 | 177 | 177 | 171 | 171 | 237 | 237 | G3  |    |
| ECU-27466         | A113             | 126                        | 234 | 234             | 151             | 151             | 196            | 196            | 175            | 175            | 141            | 141           | 194 | 194 | 177 | 177 | 171 | 171 | 235 | 235 | G1  |    |
| ECU-27467         | A114             | 127                        | 234 | 234             | 151             | 151             | 196            | 196            | 175            | 175            | 141            | 141           | 194 | 194 | 177 | 177 | 171 | 171 | 235 | 235 | G1  |    |
| ECU-27468         | A115             | 128                        | 234 | 234             | 151             | 151             | 196            | 196            | 175            | 175            | 141            | 141           | 194 | 194 | 177 | 177 | 171 | 171 | 235 | 235 | G1  |    |
| ECU-27469         | A116             | 129                        | 234 | 234             | 151             | 151             | 196            | 196            | 175            | 175            | 141            | 141           | 194 | 194 | 177 | 177 | 171 | 171 | 235 | 235 | G1  |    |
| ECU-27470         | A117             | 130                        | 234 | 234             | 151             | 151             | 196            | 196            | 175            | 175            | 141            | 141           | 194 | 194 | 177 | 177 | 171 | 171 | 235 | 235 | G1  |    |
| ECU-27471         | A118             | 131                        | 234 | 234             | 151             | 151             | 196            | 196            | 175            | 175            | 141            | 141           | 194 | 194 | 177 | 177 | 171 | 171 | 235 | 235 | G1  |    |
| ECU-27472         | A119             | 132                        | 234 | 234             | 151             | 151             | 196            | 196            | 175            | 175            | 141            | 141           | 194 | 194 | 177 | 177 | 171 | 171 | 235 | 235 | G1  |    |
| HDEB-295          | A120             | 133                        | 234 | 234             | 151             | 151             | 196            | 196            | 175            | 175            | 141            | 141           | 194 | 194 | 177 | 177 | 171 | 171 | 235 | 235 | G1  |    |
| ECU-27473         | A121             | 134                        | 234 | 234             | 151             | 151             | 196            | 196            | 175            | 175            | 141            | 141           | 194 | 194 | 177 | 177 | 171 | 171 | 235 | 235 | G1  |    |
| HDEB-298          | A122             | 135                        | 234 | 234             | 151             | 151             | 196            | 196            | 175            | 175            | 141            | 141           | 194 | 194 | 177 | 177 | 171 | 171 | 235 | 235 | G1  |    |
| HDEB-300          | A123             | 136                        | 234 | 234             | 151             | 151             | 196            | 196            | 175            | 175            | 141            | 141           | 194 | 194 | 177 | 177 | 171 | 171 | 235 | 235 | G1  |    |
| ECU-27474         | A124             | 137                        | 234 | 234             | 151             | 151             | 196            | 196            | 175            | 175            | 141            | 141           | 194 | 194 | 177 | 177 | 171 | 171 | 235 | 235 | G1  |    |

Supplementary Table S1. Continued.

| INIAP GB<br>Code * | Analysis<br>Code | Province<br>Collection | Nº  | 1_GB<br>AMM-051 |     | 2_GB<br>AMM-099 |     | 3_GB<br>AMM-136 |     | 4_AH<br>AAC011 |     | 5_AH<br>AAC021 |     | 6_AH<br>AAT030 |     | 7_AH<br>AAT051 |     | 8_AH<br>AAT063 |     | 9_AH<br>AC062 |      | G  |
|--------------------|------------------|------------------------|-----|-----------------|-----|-----------------|-----|-----------------|-----|----------------|-----|----------------|-----|----------------|-----|----------------|-----|----------------|-----|---------------|------|----|
| ECU-27475          | A125             | Cañar<br>Collection B  | 138 | 234             | 234 | 151             | 151 | 196             | 196 | 175            | 175 | 141            | 141 | 194            | 194 | 177            | 177 | 171            | 171 | 235           | 235  | G1 |
| ECU-27476          | A126             |                        | 139 | 234             | 234 | 151             | 151 | 196             | 196 | 175            | 175 | 141            | 141 | 194            | 194 | 177            | 177 | 171            | 171 | 235           | 235  | G1 |
| ECU-27477          | A127             |                        | 140 | 234             | 234 | 151             | 151 | 196             | 196 | 175            | 175 | 141            | 141 | 194            | 194 | 177            | 177 | 171            | 171 | 235           | 235  | G1 |
| <i>HDEB-307</i>    | A128             |                        | 141 | 234             | 234 | 151             | 151 | 196             | 196 | 175            | 175 | 141            | 141 | 194            | 194 | 177            | 177 | 171            | 171 | 235           | 235  | G1 |
| ECU-27478          | A129             |                        | 142 | 234             | 234 | 151             | 151 | 196             | 196 | 175            | 175 | 141            | 141 | 194            | 194 | 177            | 177 | 171            | 171 | 235           | 235  | G1 |
| ECU-27479          | A130             |                        | 143 | 234             | 234 | 151             | 151 | 196             | 196 | 175            | 175 | 141            | 141 | 194            | 194 | 177            | 177 | 171            | 171 | 235           | 235  | G1 |
| ECU-27480          | A131             |                        | 144 | 234             | 234 | 151             | 151 | 196             | 196 | 175            | 175 | 141            | 141 | 194            | 194 | 177            | 177 | 171            | 171 | 235           | 235  | G1 |
| ECU-27481          | A132             |                        | 145 | 234             | 234 | 151             | 151 | 196             | 196 | 175            | 175 | 141            | 141 | 194            | 194 | 177            | 177 | 171            | 171 | 235           | 235  | G1 |
| ECU-27482          | A133             |                        | 146 | 234             | 234 | 151             | 151 | 196             | 196 | 175            | 175 | 141            | 141 | 194            | 194 | 177            | 177 | 171            | 171 | 235           | 235  | G1 |
| ECU-27483          | A134             |                        | 147 | 234             | 234 | 151             | 151 | 196             | 196 | 175            | 175 | 141            | 141 | 194            | 194 | 177            | 177 | 171            | 171 | 235           | 235  | G1 |
| ECU-27484          | A135             |                        | 148 | 234             | 234 | 151             | 151 | 196             | 196 | 175            | 175 | 141            | 141 | 194            | 194 | 177            | 177 | 171            | 171 | 235           | 235  | G1 |
| ECU-27485          | A136             |                        | 149 | 234             | 234 | 151             | 151 | 196             | 196 | 175            | 175 | 141            | 141 | 194            | 194 | 177            | 177 | 171            | 171 | 235           | 235  | G1 |
| ECU-27486          | A137             |                        | 150 | 234             | 234 | 151             | 151 | 196             | 196 | 175            | 175 | 141            | 141 | 194            | 194 | 177            | 177 | 171            | 171 | 235           | 235  | G1 |
| ECU-27487          | A138             |                        | 151 | 234             | 234 | 151             | 151 | 196             | 196 | 175            | 175 | 141            | 141 | 194            | 194 | 177            | 177 | 171            | 171 | 235           | 235  | G1 |
| ECU-27488          | A139             |                        | 152 | 234             | 234 | 151             | 151 | 196             | 196 | 175            | 175 | 141            | 141 | 194            | 194 | 177            | 177 | 171            | 171 | 235           | 235  | G1 |
| ECU-2210           | INIAP-Alegría    |                        | 237 | 237             | 157 | 157             | 208 | 208             | 175 | 175            | 162 | 162            | 194 | 232            | 177 | 192            | 171 | 189            | 166 | 166           | G_A1 |    |
|                    |                  |                        | 237 | 237             | 157 | 157             | 208 | 208             | 175 | 175            | 162 | 162            | 194 | 235            | 177 | 192            | 171 | 171            | 166 | 166           | G_A2 |    |
|                    |                  |                        | 237 | 237             | 157 | 157             | 208 | 208             | 175 | 175            | 162 | 162            | 232 | 235            | 177 | 192            | 171 | 189            | 166 | 166           | G_A3 |    |

\* A collection code is indicated in italics for accessions in which the farmer did not donate the seeds collected during 2014-2015 to be conserved in INIAP GB.



**Supplementary Table S4.** Analysis of molecular variance (AMOVA) of 152 black amaranth samples distributed in the three provinces (Imbabura, Tungurahua, and Cañar) and for both collections (A and B). The analysis has been carried out considering both collections and also for each collection separately.

| Source of variation               | Degrees of freedom | Sum of squares | Variance component | % of variation | <i>p</i> -value |
|-----------------------------------|--------------------|----------------|--------------------|----------------|-----------------|
| Among collections                 | 1                  | 0.457          | 0.000              | 0.0            | 0.0001          |
| Among provinces                   | 4                  | 27.175         | 0.116              | 17.9           | 0.0001          |
| Among accessions within provinces | 146                | 145.974        | 0.469              | 72.4           | 0.0001          |
| Within accessions                 | 152                | 9.500          | 0.063              | 9.7            | 0.0001          |
| Total                             | 303                | 183.105        |                    |                |                 |
| Among provinces in Collection A   | 2                  | 17.417         | 0.206              | 26.8           | 0.0001          |
| Among accessions within provinces | 55                 | 57.152         | 0.476              | 62.0           | 0.0001          |
| Within accessions                 | 58                 | 5.000          | 0.086              | 11.2           | 0.0001          |
| Total                             | 115                | 79.569         |                    |                |                 |
| Among provinces in Collection B   | 2                  | 9.757          | 0.062              | 10.9           | 0.0001          |
| Among accessions within provinces | 91                 | 88.822         | 0.464              | 80.8           | 0.0001          |
| Within accessions                 | 94                 | 4.500          | 0.048              | 8.3            | 0.0001          |
| Total                             | 187                | 103.080        |                    |                |                 |

**Supplementary Table S5.** Analysis of molecular variance (AMOVA) of 152 black amaranth samples distributed in the two clusters defined by STRUCTURE analysis.

| Source of variation              | Degrees of freedom | Sum of squares | Variance component | % of variation | <i>p</i> -value |
|----------------------------------|--------------------|----------------|--------------------|----------------|-----------------|
| Among clusters                   | 1                  | 136.626        | 3.650              | 96.0           | 0.0001          |
| Among accessions within clusters | 150                | 36.980         | 0.092              | 2.4            | 0.0001          |
| Within accessions                | 152                | 9.500          | 0.063              | 1.6            | 0.0001          |
| Total                            | 303                | 183.105        |                    |                |                 |
